# Supplementary material for: Oxygen mediated highly efficient cobalt(ii) porphyrin-catalyzed reduction of functional chromones: experimental and computational studies
Source: Royal Society of Chemistry journal article supplement (doi:10.1039/c9nj00266a), 2019-01-01
Supplement: c9nj00266a1.pdf [file c9nj00266a1.pdf]

## Supporting Information – To be published in [New Journal of Chemistry]

### Oxygen mediated highly efficient cobalt(II) porphyrin-catalyzed reduction of functional chromones: Experimental and Computational studies

Poonam<sup>a,b,\*</sup>, Pratibha Kumari<sup>c</sup>, Maria Grishina<sup>b</sup>, Vladimir Potemkin<sup>b</sup>, Abhishek Verma<sup>d</sup>, Brijesh Rathi<sup>b,d</sup>

<sup>a</sup>Department of Chemistry, Miranda House, University of Delhi, Delhi-110007, India

<sup>b</sup>South Ural State University, Laboratory of Computational Modeling of Drugs, 454080, Russia

<sup>c</sup>Department of Chemistry, Deshbandhu College, University of Delhi, Delhi-110007, India

<sup>d</sup>Laboratory for Translational Chemistry and Drug Discovery, Department of Chemistry, Hansraj College, University of Delhi, Delhi-110007, India

E-mail: [apoonam.chemistry@mirandahouse.ac.in](mailto:apoonam.chemistry@mirandahouse.ac.in); Fax: +91-11-27667437; Tel: +91-9899125440

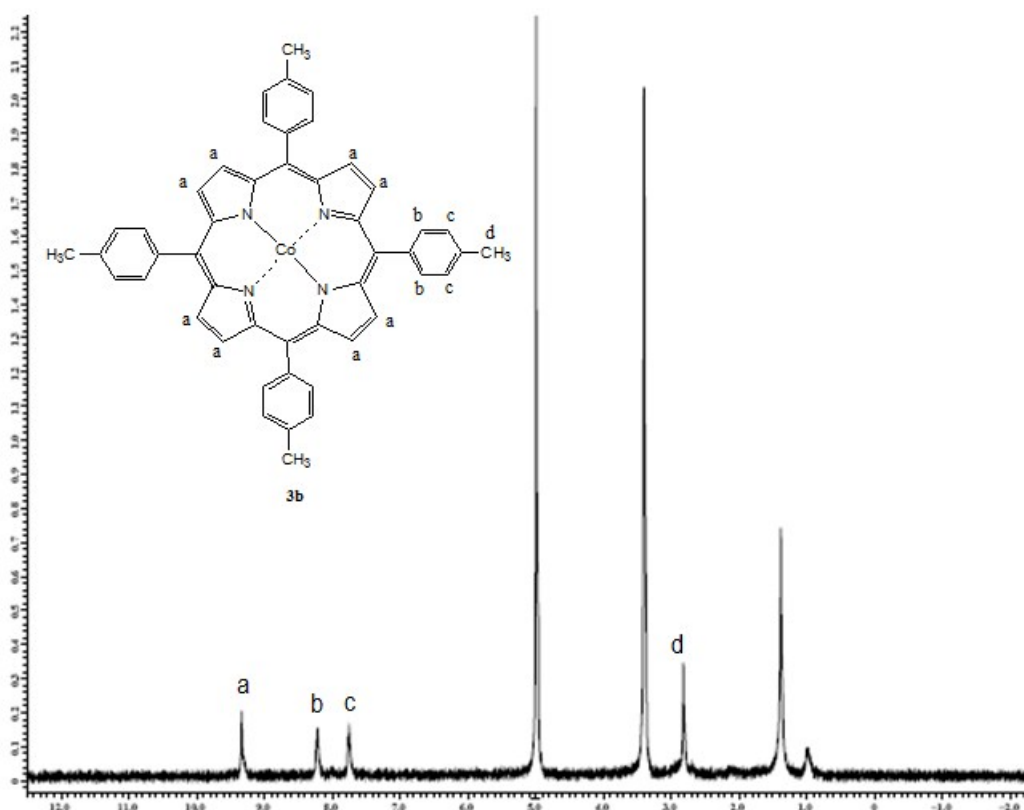

**Fig. 1.** NMR spectrum of Co<sup>II</sup>TPP **3b** in MeOD under oxygen atmosphere

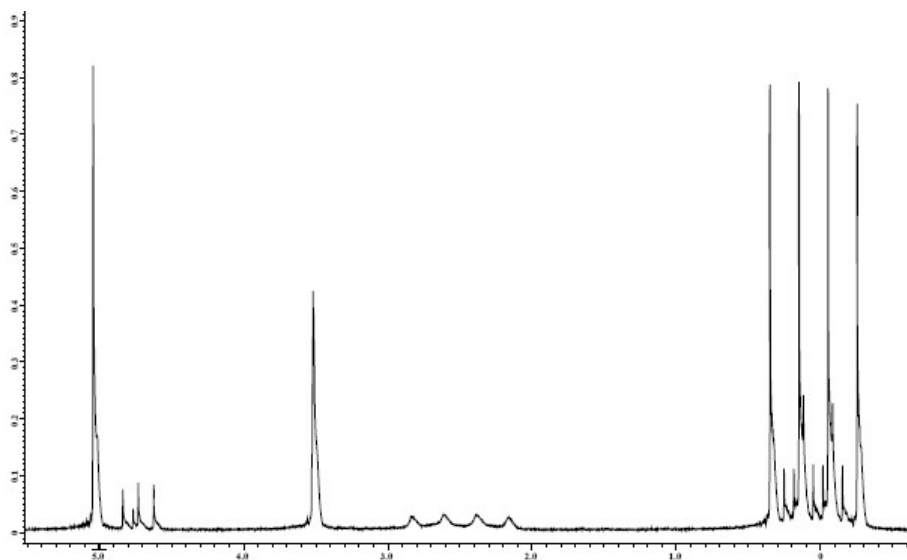

**Fig. 2.** NMR spectrum of NaBH<sub>4</sub> in MeOD

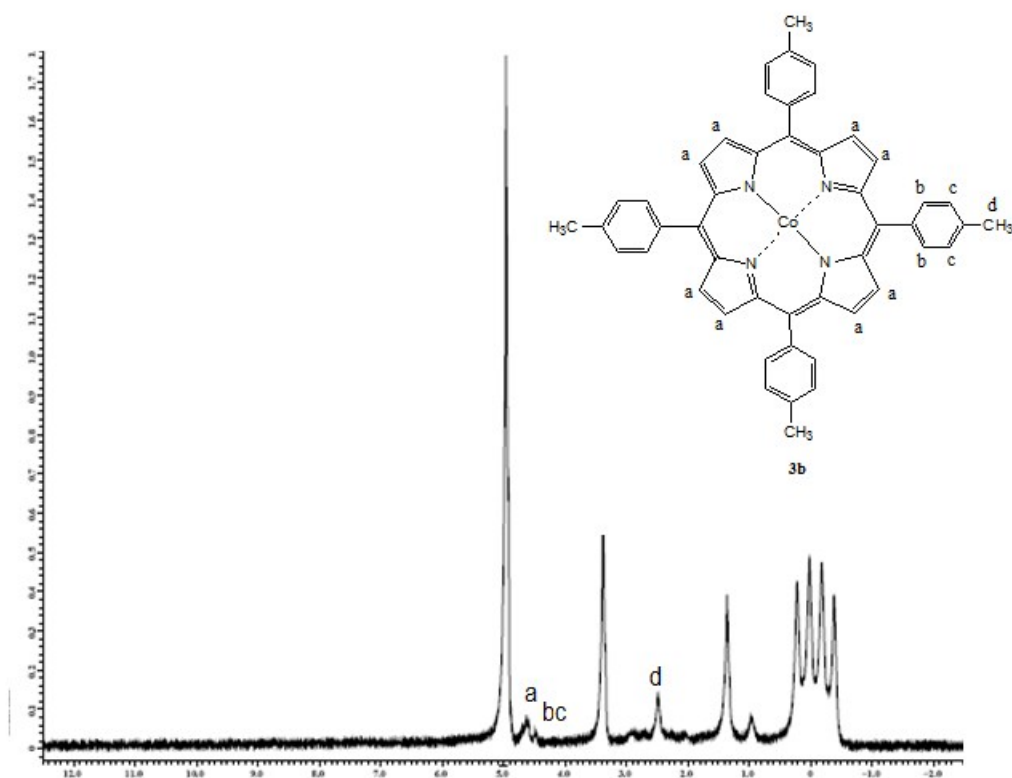

**Fig. 3.** <sup>1</sup>H NMR spectra of Co<sup>II</sup>TPP **3b** on addition of NaBH<sub>4</sub> in MeOD

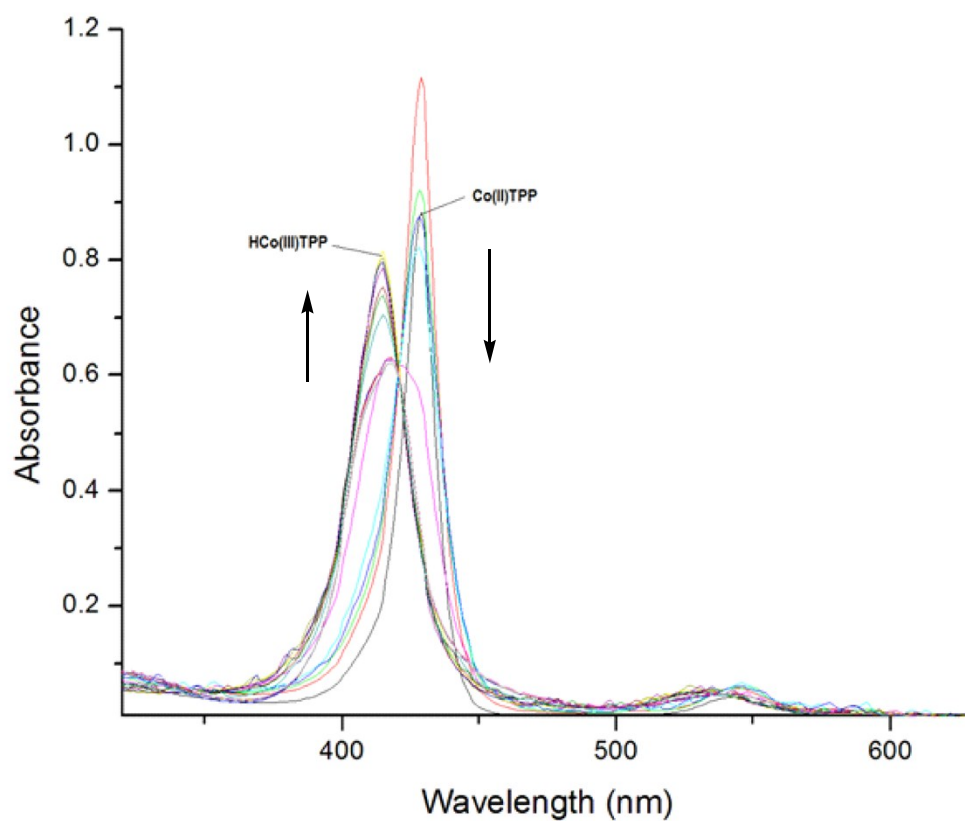

**Fig 4.** UV-vis spectra of **3b** in methanol on addition of  $\text{NaBH}_4$  in methanol at an interval of 1 min. catalysis.

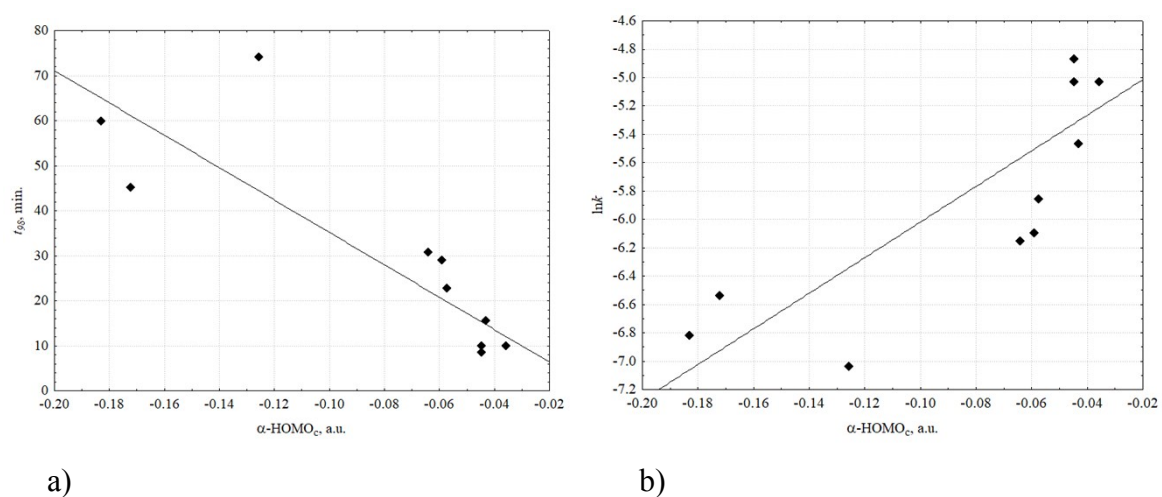

**Fig. 5.** Relationships: a) 98% conversion times with  $\alpha\text{-HOMO}_c$ ; b) logarithms of the rate constant

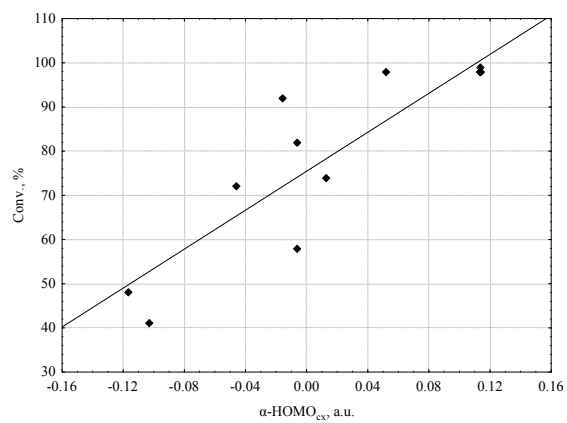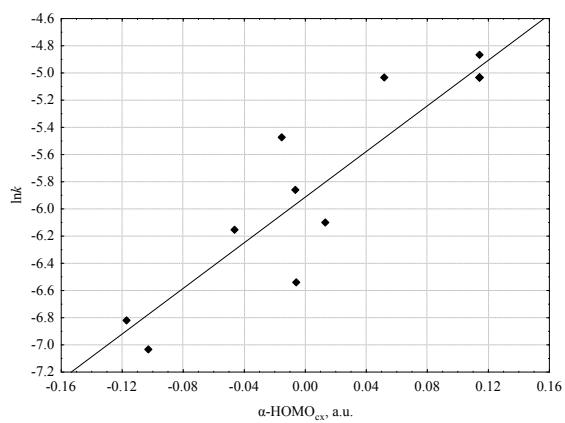

a)

b)

**Fig. 6.** Relationships: a) conversions; b) logarithms of the rate constant with  $\alpha$ -HOMO<sub>CX</sub>
